# Supplementary material
Source: MDPI journal article supplement (https://www.mdpi.com/2073-4395/14/5/896)
Supplement: s1 [file s1]

# Effects of Dark Treatment on Lignin and Cellulose Synthesis in Celery

Shunhua Zhu <sup>1,2,†</sup>, Xiulai Zhong <sup>1,2,†</sup>, Xinqi Zhang <sup>3</sup>, Aisheng Xiong <sup>4</sup>, Qing Luo <sup>1,2</sup>, Kun Wang <sup>1,2</sup>, Mengyao Li <sup>5,\*</sup> and Guofei Tan <sup>1,2,\*</sup>

<sup>1</sup> Institute of Horticulture, Guizhou Academy of Agricultural Sciences/Horticultural Engineering Technology Research Center of Guizhou, Guiyang 550006, China; zsh2801@163.com (S.Z.); gzzyzxl@foxmail.com (X.Z.); lqing985@foxmail.com (Q.L.); wangkunfun@hotmail.com (K.W.)

<sup>2</sup> Key Laboratory of Crop Gene Resources and Germplasm Innovation in Karst Mountain Area of Agriculture and Rural Ministry, Guizhou Academy of Agricultural Science, Guiyang 550006, China

<sup>3</sup> College of Agricultural, Guizhou University, Guiyang 550025, China; zhangxq202308@163.com

<sup>4</sup> State Key Laboratory of Crop Genetics & Germplasm Enhancement and Utilization, Ministry of Agriculture and Rural Affairs Key Laboratory of Biology and Germplasm Enhancement of Horticultural Crops in East China, College of Horticulture, Nanjing Agricultural University, Nanjing 210095, China; xiongaisheng@njau.edu.cn

<sup>5</sup> College of Horticulture, Sichuan Agricultural University, Chengdu 611130, China

\* Correspondence: limy@sicau.edu.cn (M.L.); tagfei@foxmail.com (G.T.)

† These authors contributed equally to this work.

# SUPPLEMENTARY FIGURE S1

## Nucleotide sequences and deduced amino acid sequences of *F5H* from celery

```

1      atggaaaccaacactaccgcatgacaattctcttcttcttccgctgcttagtttcttcttcttccagcttttcgacgtaaacgt
M E T N T T A M T I L F F I L P L L S F F L L S S F R R K R
91      taccctccaggcccgaaaggttggcccatcatcggaacttggatgatggacaagctatctcatctggactggctaaacttgcgtct
Y P P G P K G W P I I G N L L M M D K L S H R G L A K L A A
181     caatatggcgcccttgtccacctccgtatgggttttcttcacatgttcaccgttttcgactcccgatatggcccgagaagttcttcaaatt
Q Y G G L V H L R M G F L H M F T V S T P D M A R E V L Q I
271     caagacaacatttttccaaccgtcctgtaccatgaatattagctacttaacttatgaccgagcggatatggctttcgcaaattacggg
Q D N I F A N R P A T M N I S Y L T Y D R A D M A F A N Y G
361     ccgttttggcgccaaatgcggaaaatatcggtcatgaagtattattagccgtaaaagggcagagtcgtgggactctgtccgtgaagaggtt
P F W R Q M R K I S V M K L F S R K R A E S W D S V R E E V
451     gatgacatggtgaaaatcggtgtgtcgaagacgggtgttcgggttaattattggagagcttgtgttcgggttaactaggaacattatttat
D D M V K I V L S K T G C S V N I G E L V F G L T R N I I Y
541     cgggcagcttttcgggacgttgttcgcacgaaggccaagacgagtttatcaagatatgacaggagttttcgaaactgtttgggtgcatcatt
R A A F G T L S H E G Q D E F I K I L Q E F S K L F G A F N
631     atctgtgattttgttccgggattaaacttgggcagatccgcaagggttcattgggtcgggtgtttaaagctagagcatcgcttgatggattc
I C D F V P G L T W A D P Q G F M G R V V K A R A S L D G F
721     atagactcaataatagatgcacacattgaaaaaagaagagcagtaaaaatgggtattatcgacgagggaaacagtgatattggtgatgaa
I D S I I D A H I E K K K S S K N G I I D E G N S D M V Y E
811     ttgctggatttttaccgtgaagaaaaggctaaagtcagcaggttgaagatcagaacagctccttgaagctcacaagagataacatcaaaa
L L D F Y G E E K A K V S E F E D Q N S S L K L T R D N I K
901     gccattatcatggatgtaattgtttgtgggacggagacggttagcatctgcaatagagtgggccatgtcagagctaatgaggagcccaaaa
A I I M D V M F G G T E T V A S A I E W A M S E L M R S P K
991     gacctcaaaaaagtcacaagaactcgtaattgtttgtggcttcaccgtcgtgttgaagaaagtatttcgacaagctcacttacctc
D L K K V Q Q E L V N V V G L H R R V E E S D F D K L T Y L
1081    aaatgctgcataaaagagactcttagactccaccctcccatccactacttttacacgagacggcccaagatgaggaggttgcgtgat
K C C I K E T L R L H P P I P L L L H E T A Q D A E V A G Y
1171    cacattccggcaaggtctcgagtcataaaactcatgggccatcaacagagacccaaactcgtggactgacccggacacattcaagcct
H I P A R S R V I I N S W A I N R D P N S W T D P D T F K P
1261    tctaggtttctacaagagggtatgcctgacttttaaaggaagcaactttgagttcataccatttgggtcgggtcggagggtcttgtccaggc
S R F L Q E G M P D F K G S N F E F I P F G S G R R S C P G
1351    atgcaacttggactttatgcacttgagatagctgtggctcaccttctgcattgttttaactgggagttacctgatggatgaagccaagt
M Q L G L Y A L E I A V A H L L H C F N W E L P D G M K P S
1441    gaagttgatactgatgatgtgtttgtctcactgctccgagggcgactcgacttgtggtgtgccaactccacgcttgtgtgtcctatc
E V D T D D V F G L T A P R A T R L V A V P T P R L L C P I
1531    tcctga
S *

```

# SUPPLEMENTARY FIGURE S2

## Nucleotide sequences and deduced amino acid sequences of *C4H* from celery

```

1  atgatggattttgctttgcttgagaaaaccctgttgggcctgttcattgcaacaattgtagccataactatttccaagctacgtggcaag
M M D F A L L E K T L L G L F I A T I V A I T I S K L R G K
91  aaactcaaactccgccaggccctattccagttcctgtgttcggtaactggttacaagttggtgatgatcttaaccagaggaacttggtg
K L K L P P G P I P V P V F G N W L Q V G D D L N Q R N L V
181  gactatgccagaagtttggagacttgtttatgttacgtatgggtcagaggaacttggttgtgtgtcctctcctgatttggctaaagat
D Y A K K F G D L F M L R M G Q R N L V V V S S P D L A K D
271  gttttgcatactcagggtgttgagtttggatcacgcacccgtaacgttgttttcgatatcttcacaggttaaggacaggacatgggttgc
V L H T Q G V E F G S R T R N V V F D I F T G K G Q D M V F
361  acagtcctatagttagcattggaggaagatgaggagaatcatgacagtacctttcttactaacaagttgtgcagcagtatcgatttggg
T V Y S E H W R K M R R I M T V P F F T N K V V Q Q Y R F G
451  tgggaggtagaggctgctcgtgttgtcagggatgttaaggccaatcctgaggctgctacaaaaggatcggttggaggaaccggttcag
W E D E A A R V V E D V K A N P E A A T K G I V L R N R L Q
541  ttgctcatgtataataatgtacagaatcatgtttgatagaaggtttgagagtgtagatgatcctttgttcttgaagcttaaggctttg
L L M Y N N M Y R I M F D R R F E S V D D P L F L K L K A L
631  aatggggagcgcagtaggcttgcctcagagcttcgagtataatttcggagattttatccctattcttcgccctttcttgagggttatctt
N G E R S R L A Q S F E Y N F G D F I P I L R P F L R G Y L
721  aaactttgccaggagatcaaggacaaaagttgaagctctttaaggattattttgtggacgagaggaagaagcttgaagcataaagagt
K L C Q E I K D K R L K L F K D Y F V D E R K K L E S I K S
811  gtgataacaacagcttgaagtgcgccatagatcatatcatagaagctcaggaaaaaggagaaatcaacgaggataacgttctttacatt
V D N N S L K C A I D H I I E A Q E K G E I N E D N V L Y I
901  gttgaaacataaatgttgcgaattgaacaacacataggtcaattgaatggggcattgcggaactagttataaacctgaaatccag
V E N I N V A A I E T T L W S I E W G I A E L V N N P E I Q
991  aagaagttgaggcatgagttggacactatgctcgggtcggagttcagatctgtgagccagacattcagaagctccttaccttcaagct
K K L R H E L D T M L G V G V Q I C E P D I Q K L P Y L Q A
1081  gtgatcaaaagagactcttcgattcagaatggccattcctcttttagtcctcacatgaaccttcatgaagcgaagcttcaggttatgac
V I K E T L R F R M A I P L L V P H M N L H E A K L A G Y D
1171  atcccggcagagagcaagatcttggatcaatgcattggtgcttgccaacaatcccgtcactggaaaaacccaatgagtttaggcctgag
I P A E S K I L V N A W W L A N N P A H W K N P N E F R P E
1261  aggttcttggaaagaatcaaaagttgaggctaattgaaaatgatttcaagtacataaccattcggggtcgggaggagaagttgccctgga
R F L E E E S K V E A N G N D F K Y I P F G V G R R S C P G
1351  ataatccttgcattgcctatcctcggtatcgtaatcgagcgttttggtgcagaactttgagctcatgcctcctcctggacaatctaaggtt
I I L A L P I L G I V I G R L V Q N F E L M P P P G Q S K V
1441  gatacagcagagaaaggaggacagttcagttcttcaattttgaagcactccactatcgtttgcacaaagatcaatttaa
D T A E K G G Q F S L Q I L K H S T I V C K P R S I *

```

# SUPPLEMENTARY FIGURE S3

## Nucleotide sequences and deduced amino acid sequences of *HCT* from celery

```

1   atgaagatcattgtacgagattcgacgatgggtggggccagcgcaggagacgccacgtcggagtttatggaacgccaacgtggacctgggtg
M K I I V R D S T M V G P A Q E T P R R S L W N A N V D L V
91  gtgccgaattttcacacgcccagtggtgtatttttacaggcctacgggatcgactaattttttcgatgcgaaagtattgaaggacgcgctg
V P N F H T P S V Y F Y R P T G S T N F F D A K V L K D A L
181 agctacgccttggtgccgttctatccgatggctgggaggttaaagaaggacgaggacgggcgctggagattgactgtcaaggacaaggt
S Y A L V P F Y P M A G R L K K D E D G R V E I D C Q G Q G
271 gtgcttttcgtcaggcggaaatccgacggagttatcgatgagttcggagacttcgcgccacgttggagcttcggaaacttattccggct
V L F V E A E S D G V I D E F G D F A P T L E L R K L I P A
361 gtgacttactttaaatgtgtggagtttcacttggagtggatgcaacatcatgctgcagatggtgcttctggtctccatttcattaac
V T Y F K C G G V S L G V G M Q H H A A D G A S G L H F I N
451 acatggtcgatatggctcggggacttgacctgaccatcccgcctttcattgatcgaccctcctcagagctcgtgacctcctaagccg
T W S D M A R G L D L T I P P F I D R T L L R A R D P P K P
541 gctttccaacacgttgaatacaacccccctccgtccatgaaaacgaatcctgatgttctcctgaaacagctgtttcgatttttaagtta
A F Q H V E Y Q P P P S M K T N P D V V P E T A V S I F K L
631 actcgagaccagctcaatataccttaaggccaagtctaaggaagaaggcaataaccattgcgtatagctcctatgaaatgttggtggacac
T R D Q L N I L K A K S K E E G N T I A Y S S Y E M L A G H
721 gtgtggcgatcagtggttaagcccgaggacttccagaagatcaggagagcaagttgtttattgcaactgatgggagagccaggctccgt
V W R S V C K A R G L P E D Q E S K L F I A T D G R A R L R
811 cctgcacttcctccaggctactttgggaatgttatattcactgctacgcctatagcagtagcaggagatctcgtatcaaagcctacttgg
P A L P P G Y F G N V I F T A T P I A V A G D L V S K P T W
901 tatagtgctagtagaatccagatgcattagtgagaatggacaacgagtacttgagatctgccttgattacttggaaattacagcctgat
Y S A S K I H D A L V R M D N E Y L R S A L D Y L E L Q P D
991 ctttaaggctcttgcaggagcacacagtttttaggtgtccgaatccttgggatcaccagttgggcaaggctgcctatccacgacgtgac
L K A L V R G A H S F R C P N L G I T S W A R L P I H D A D
1081 tttggttggggaagaccgatatttatgggacctggcggaattgcatatgaaggactgagcttcgtgttcctagcccttctaattgatggc
F G W G R P I F M G P G G I A Y E G L S F V L P S P S N D G
1171 agcttatctgttgcgatttctctgcaagcagaacacatgaaactcttagcaagttcttatatgacatttga
S L S V A I S L Q A E H M K L F S K F L Y D I *

```

# SUPPLEMENTARY FIGURE S4

## Nucleotide sequences and deduced amino acid sequences of *4CL* from celery

```

1      atgggagattgtgtaccagcacacaagacattatattccggctcgaactccccgatatttacatcccgaagcaccttccgttacatact
M G D C V A P A Q D I I F R S K L P D I Y I P K H L P L H T
91     tactgtttcgaataatttcgaagttggcgataaggcctgtttaataatggcgctacaggcgaacgttcacttattctcaagttgag
Y C F E N I S K V G D K A C L I N G A T G E T F T Y S Q V E
181    ctcatctccagaaaagttgcatcagggtttaataaaactcggcattcaacaggccgataccatcatgtcctgtctcccaactcccctgag
L I S R K V A S G L N K L G I Q Q A D T I M L L L P N S P E
271    tattttttcgcttttttaggcgcacgtatcgtggcgagtttctactatggccaatccggtttttcacctcagctgaggtgatcaaacag
Y F F A F L G A S Y R G A V S T M A N P F F T S A E V I K Q
361    ctcaaagcatctcaagctaagctcataattacgcaagcttgttacgtggacaaagttaaagactatgcgaaagagaacaacatacagatc
L K A S Q A K L I I T Q A C Y V D K V K D Y A K E N N I Q I
451    gtctgcatcgtatgatgctcctcaggattgtttacatttctcgaactcatggaagctgatgaatcagaatgcctgaggtagtgatcaat
V C I D D A P Q D C L H F S K L M E A D E S E M P E V V I N
541    tcagacgatgtcgtttcgctaccttactcatcagggtaccacaggattgcctaaagggtttatgtttgacgcacaaaggactgtttactagc
S D D V V A L P Y S S G T T G L P K G V M L T H K G L V T S
631    gtggcacaacaagttgatggagacaatcccaattgtatattcatagcgaggatgtgatgatctgcataattgcctttgtttcacatttat
V A Q Q V D G D N P N L Y I H S E D V M I C I L P L F H I Y
721    tcgcttaacgctgtttgtgctgtggactcagagcaggcgtgaccattttgattatgcagaattcgatattgagccatttttggaaactg
S L N A V L C C G L R A G V T I L I M Q K F D I E P F L E L
811    atacaaaaataaggttacaaattggaccgtttgtgccaccaattgtattggcgattgccaaaagtccagtggtggataagtgatgtttg
I Q K Y K V T I G P F V P P I V L A I A K S P V V D K Y D L
901    tcgtcgggtgaggacggttatgtctggagctgctccgttagggaaggagcttgaagatgctgttagagctaagtttccaatgccaaactt
S S V R T V M S G A A P L G K E L E D A V R A K F P N A K L
991    ggtcagggatattggaatgacagaggcagggccagttttagcaatgtgcctggcggtttgcaaaggaaccatacagatcaaatcgggtgct
G Q G Y G M T E A G P V L A M C L A F A K E P Y E I K S G A
1081   tgcggaactgttttgagaaatgctgaaatgaaaattgtggatcctgagaccaacgcctctctccacggaacgagcggggagaaatttgc
C G T V V R N A E M K I V D P E T N A S L P R N E R G E I C
1171   attcgaggtgatcaaatcatgaaagttatctcaatgatcctgaatcaacaagacaacaatagatgaggagggtggtgtgcacacagga
I R G D Q I M K G Y L N D P E S T K T T I D E E G W L H T G
1261   gatataggcttcattgacggcgatgatgagctatttattgttgatagactaaaggaaataatcaatacaaaaggcttcagggttgccct
D I G F I D G D D E L F I V D R L K E I I K Y K G F Q V A P
1351   gctgaacttgaagctctgctacttactcctaccatttctgatgctgcagttgtttccatgatagatgagaaagctggtgaggtgcct
A E L E A L L L T H P T I S D A A V V S M I D E K A G E V P
1441   gtggcttttgttgagaactaacggtttcaccactactgaggatgaaatcaagcaattcgtctcgaacagggtgtgttctacaagaga
V A F V V R T N G F T T T E D E I K Q F V S K Q V V F Y K R
1531   atatttcgtgtatttttgggtgatgcaattccgaaatccatccggaagattcttcgaaaggagttgagagcaagaatagcatccggt
I F R V F F V D A I P K S P S G K I L R K E L R A R I A S G
1621   gatctacctaataa
D L P K *

```

# SUPPLEMENTARY FIGURE S5

## Nucleotide sequences and deduced amino acid sequences of *CCR* from celery

```

1   atgccttctgtttcaggccaggttgtttgtgtcacccggcgccggaggtttcatcgcttcattggttgggttaagttgcttctggagaaaggt
M P S V S G Q V V C V T G A G G F I A S W L V K L L L E K G
91  tatactgttcgtggaactgttagaaatccaggtgatccaaagaatggtcatctgagagagcttgaaggagcggaggagagattgatatta
Y T V R G T V R N P G D P K N G H L R E L E G A E E R L I L
181 tgcaaagctgatctacttgattacgaaagtctgcgagaagccatcaatggctgtgatgggtgtttccactgcattctcgggttactgat
C K A D L L D Y E S L R E A I N G C D G V F H T A S P V T D
271 gatcctgaacaaatggtggaaccagcagtaattggaactaagaatgtgattgttcagctgcggaagccaaagttcgtcgtgtgtttt
D P E Q M V E P A V I G T K N V I V A A A E A K V R R V V F
361 acgtcgtctattggggcagtttacatgtccgccaacaggagccctgatgaggttattgatgaaagttgctggagtgatctcgaattctgc
T S S I G A V Y M S A N R S P D E V I D E S C W S D L E F C
451 aagaacactaggaactggtattgctatggtaaagcggtagcagagcaagcgccctgggaagaggcaaagcagagaggagtagacatggtg
K N T R N W Y C Y G K A V A E Q A A W E E A K Q R G V D M V
541 gcacttaatccggtactggtgcttggaccagttctgcagtcaactataaatgccagcattgttcatatcctcaaatacctcaccggatca
A L N P V L V L G P V L Q S T I N A S I V H I L K Y L T G S
631 gccaaacttatgctaactcagttcaggcctatgtccatgttaaggatgttgcagctgcacacattcttctgtttgagaatccgctctgca
A K T Y A N S V Q A Y V H V K D V A A A H I L L F E N P S A
721 accggagcctacctctgtgccgagagctcattcaccgcggtgatgttgcgaaattctggcaaatatcttccggaatatcctattcct
T G R Y L C A E S S L H R G D V V E I L A K Y F P E Y P I P
811 accaagtgttctgatcaagttaagccaagagcaagccgctgaagttctcaaaccaaaagctaaaggatttgggattcgagtttacacca
T K C S D Q V K P R A K P L K F S N Q K L K D L G F E F T P
901 gtgaagcaatgcttatatgaaactgtgaagagtttgaggagaaaggtcacctcccagtcctaccagcagcaacaagatgctaatggt
V K Q C L Y E T V K S L Q E K G H L P V P T Q Q Q Q D A N V
991 caacgcgttcatatccagtccttag
Q R V H I Q S *

```

# SUPPLEMENTARY FIGURE S6

## Nucleotide sequences and deduced amino acid sequences of *PAL* from celery

1 atggcatatgtaaatggtaccgcgaacgggtatgcaaacgggaacgggaacggggttgatttgtgcatgaagaacgaggatccgctgagc  
M A Y V N G T A N G Y A N G N G N G V D L C M K N E D P L S  
91 tggggagtgggcgggagggcgttgacagggagtcatttggatgaagttaagaggatggtggctgagtagacaggaagccggtggtagattg  
W G V A A E A L T G S H L D E V K R M V A E Y R K P V V K L  
181 ggaggagaacactgacgatagctcaggtggcagctgtgtcagctagggatgacagtggctttaaggtggagctttccgagacggcgaga  
G G E T L T I A Q V A A V S A R D D S G L K V E L S E T A R  
271 gctggcgttaaaagctagtagtgattgggtgatggatagtagtaataaaggacagatagttatggtgttactactggttttgggtgctact  
A G V K A S S D W V M D S M N K G T D S Y G V T T G F G A T  
361 tctcataggaggactaaacaagtggtgctcttcaaaaggagcttattaggttcttgaatgctggaatatttggtagtgagctgaagct  
S H R R T K Q G G A L Q K E L I R F L N A G I F G S G A E A  
451 ggtaacaacacattaccacactcggcaacaagacagcaatgcttggtagaatcaacacactcctccaaggctattcaggaatccgattc  
G N N T L P H S A T R A A M L V R I N T L L Q G Y S G I R F  
541 gagatccttgaagccatcaccaagtttcttaaccacaacattactccttgttggcactcctggtgtacgatcactgcttctggagatcct  
E I L E A I T K F L N H N I T P C L P L R G T I T A S G D L  
631 gtgccattgtcgtacattgtcggacttctcactggtcgccctaactcgaaggctgttggacctactggagtaacactcagccctgaagag  
V P L S Y I A G L L T G R P N S K A V G P T G V T L S P E E  
721 gctttaagcttctggtgtggaaggtggatttttcgagttacagccaaagggaaggcctggcacttggttaaggaaacagctgttggttct  
A F K L A G V E G G F F E L Q P K E G L A L V N G T A V G S  
811 ggcatggcctctatggtacttttcgaggctaataatattagcagtgtagtggaagttagtcagcaattttcgtgaagtgtatgcagggg  
G M A S M V L F E A N I L A V L A E V M S A I F A E V M Q G  
901 aagcctgaatttacagaccatttgacacataagttgaagcaccatcccgccaaattgaggtgcagctataatggaacacattctggat  
K P E F T D H L T H K L K H H P G Q I E A A A I M E H I L D  
991 ggaagcgcgtacgttaaggctgctcaaaagctacatgaattggatccattacagaacacaaacaggacagatatgctctcagaacatct  
G S A Y V K A A Q K L H E M D P L Q K P K Q D R Y A L R T S  
1081 cctcagtggtcctcctcaaatggaattatcagatcatcgactaaatgatcgaaagagagatcaactctgtcaatgataacccattg  
P Q W L G P Q I E V I R S S T K M I E R E I N S V N D N P L  
1171 attgatgtttccaggaacaaggctatacatggtggaatttccagggaaacccaattggtgtttcaatggacaacacacgtttggctatt  
I D V S R N K A I H G G N F Q G T P I G V S M D N T R L A I  
1261 gcggccataggaagcttatgtttgtcattttcagagcttgcacagcacttctacaacaacgggttgccatcaaatgtctggaggg  
A A I G K L M F A Q F S E L V N D F Y N N G L P S N L S G G  
1351 cgtaacccgagcttggattatggattcaagggtgctgaaattgccatggcacttactgctgaactccagtttttagccaatccagtg  
R N P S L D Y G F K G A E I A M A S Y C S E L Q F L A N P V  
1441 actaacatgtccaaagtgtgaacagcacaatcaagatgtgaactctttgggtttaatatcttcaaggaaaacatcagaagctgttgaa  
T N H V Q S A E Q H N Q D V N S L G L I S S R K T S E A V E  
1531 atcttgaactcatgtctactacatttttagtgggtctgtgccaaagctatagacttgaggcatttggagaagaatttgaagagcactgtt  
I L K L M S T T F L V G L C Q A I D L R H L E E N L K S T V  
1621 aaaaacacagtgagccaagtagctaagagagtactaaccatgggtgttaacggtagctccatccctcaagattctgcgagaagatttg  
K N T V S Q V A K R V L T M G V N G E L H P S R F C E K D L  
1711 cttagagtttagaccgtgaatacatattttgcctacattgatgatccctgcagcgcaacctaccattgatgcaaaaactaaggagact  
L R V V D R E Y I F A Y I D D P C S A T Y P L M Q K L R E T  
1801 ctagttgagcatgcattgaacaatggtgacaagagaggaacttgagcacttccatcttccaaaagattgcagccittgaggatgaacta  
L V E H A L N N G D K E R N L S T S I F Q K I A A F E D E L  
1891 aaggtattctgcctaaagaagtcgagagtgctagagccgcgttgaaagtggaaatccggcaatccctaacaggatcaaggaatgcagg  
K A I L P K E V E S A R A A L E S G N P A I P N R I K E C R  
1981 tcttaccactgtacaagttgtgagggagaactgggaacagagtatcttactggagaaaaagcgcatcacctggggaagagttcgat  
S Y P L Y K F V R E E L G T E Y L T G E K A R S P G E E F D  
2071 aaggtatttacagcaatgtctaaagtgagataattgatccattgctggagtgtctgcagtcagtggaatggtgctcctcttccaattctgc  
K V F T A M S K G E I I D P L L E C L Q S W N G A P L P I C  
2161 taa  
\*

# SUPPLEMENTARY FIGURE S7

## Nucleotide sequences and deduced amino acid sequences of *POD* from celery

```

1      agttgtcagttgtcacagttcagcaaaatgaaggcttttaattttgtgtttggtagttataagcatgctggatatttctgagttctact
      M K A F N Y L C L V V I S M L V F L S S T
91     catgcacaattgaagatgggattttactcaacgagctgtcctaatagcagagaagattgtgcaggattatgtgaatgagcacattcctaata
      H A Q L K M G F Y S T S C P N A E K I V Q D Y V N E H I P N
181    gctccatcactagctgcagcttttgattagaatgcatttccatgattgctttgttcggggttgatgcgtctatcttgctgaattcaact
      A P S L A A A L I R M H F H D C F V R G C D A S I L L N S T
271    gcaacaacatcaggagacaaactgagaggtttgctgttccgaatcagacagttcgaggattcgattttattgacagaatcaaaagccta
      A T T S G R Q T E R F A V P N Q T V R G F D F I D R I K S L
361    cttgaagctgcatgccctggagtagtctcctgcgcagatattatcactttggctgcaagagactccattgttgcactggaggtccaact
      L E A A C P G V V S C A D I I T L A A R D S I V V T G G P T
451    tggaaggtaccaacaggcagaagagacggatcgatatcaaatgtcacggaagctaacaacaacatccctgccccaaagtttcaattttcc
      W K V P T G R R D G S I S N V T E A N N N I P A P S F N F S
541    agcttgcaacaagtttcgctaacgagggccttgatcttaatgatcttgttctcttatccggtgctcacacaattggaattgctcattgc
      S L Q T S F A N E G L D L N D L V L L S G A H T I G I A H C
631    aactccttctctagccggtatacaatttactggaagaggagaccaagatccggcattagacagcgaatacgaacaaacttgaaagct
      N S F S S R L Y N F T G R G D Q D P A L D S E Y A T N L K A
721    aacaaatgcagatcaatcagagacaacactacaaaagttgaaatggatcccggaagtgc tagaacatttgaccttagctactactcgctt
      N K C R S I R D N T T K V E M D P G S A R T F D L S Y Y S L
811    ctactgaagcgaagaggcctatttgaatccgattcagcattaacaacaagctcaaccacaacaattttatcactcaacttgttcaggga
      L L K R R G L F E S D S A L T T S S T T N N F I T Q L V Q G
901    tcacaaaagaatttctctctcagtttgcaaagtcattggagaaaatgggtcgaatcaatgtcaagacagggctctctggagagataagg
      S Q K N F F S Q F A K S M E K M G R I N V K T G S S G E I R
991    aaagtatgcgcctttgtgaatagttaa
      K V C A F V N S *

```



# SUPPLEMENTARY FIGURE S8

## Nucleotide sequences and deduced amino acid sequences of *CAD* from celery

```

1      atgggtagcttggaattgagagaaaaacaacaggatgggctgcaagagatcccttctgggtgttctctcaccttactcttacactctcaga
M G S L E I E R K T T G W A A R D P S G V L S P Y S Y T L R
91     gagacaggccccagaagatataattatcaggattacttgttgggatttgcatactgatattcatcagggtcaagaatgatcttggagct
E T G P E D I F I R I T C C G I C H T D I H Q V K N D L G A
181    tccaattaccccatggttccaggcatgaagtagttgggtgaggtggagggttgaactgatgtgaccaagtccaagacaggagattgt
S N Y P M V P G H E V V G E V V E V G T D V T K F K T G D C
271    gtcggagttggcacaatcgttggatgttgtaaaacctgcaggccgtgcacgcgtgatgttgagcagtactgcaacaagaagatctggctt
V G V G T I V G C C K T C R P C I A D V E Q Y C N K K I W S
361    tacaacgatgtctacacgatggcaagccccaccaaggaggtctctccagctcaatggctcgtcaatcaaaagtttgcggtgaaaatacca
Y N D V Y T D G K P T Q G G F S S S M V V N Q K F A V K I P
451    gatggaatggcaccggaacaggcagcacctctattatgtgcaggggtgactgtttatagtcctctgactcattttggattaagtaagatt
D G M A P E Q A A P L L C A G V T V Y S P L T H F G L S K I
541    gctggacttaaaaggggcatattggggcttggagggttggacacatgggggtcaagttagcgaagccatggggcatcacgtgactgtc
A G L K G G I L G L G G V G H M G V K L A K A M G H H V T V
631    ataagctcatctgataagaagaagaggaggcattggatcatcttgggtgcagatgcttatcttgtcagctcggatgctactcaaatacaa
I S S S D K K K E E A L D H L G A D A Y L V S S D A T Q M Q
721    gaagctgctgattcgcttgattatattgacaccgtgcctgtttttcaccacttgaaccttacctttccttggtaaaacttgatggg
E A A D S L D Y I I D T V P V F H P L E P Y L S L L K L D G
811    aagttgatcttgatgggggttatcaacactcctttgcagtttatctccccatgggttatgctcgggagaaaggccataacaggagcttc
K L I L M G V I N T P L Q F I S P M V M L G R K A I T G S F
901    ataggagcataaaagaacagaggaaatgcttgatttttgcataaaagggaattacttcaacaatcgaagtagtgaagatggattac
I G S I K E T E E M L D F C N E K G I T S T I E V V K M D Y
991    atcaacaaagccitttgagggttggagaaaacgacgtcagataccgggtttgtttagatatttcaggcagcaaaccttgatcaagaaca
I N K A F E R L E K N D V R Y R F V V D I S G S K L D Q E T
1081  taa
      *
```

# SUPPLEMENTARY FIGURE S9

## Nucleotide sequences and deduced amino acid sequences of *CCoAOMT* from celery

```

1      atggcttctaagtctgaatccaacattcagaagttgggcacaagagtcctttgcagagtgatgctctttatcagtataacttgaaaca
M A S N A E S K H S E V G H K S L L Q S D A L Y Q Y I L E T
91     agtgtgtaccaagagagccagaggcaatgaaagagcttagagatgtcactgccaaagcatccatggaatctgatgacaacatcagctgat
S V Y P R E P E A M K E L R D V T A K H P W N L M T T S A D
181    gaagggcagttcttgagcatgcttttgaagctcatcaatgccaaagacacccatggagattgggtgtttacactggttattctctccttgcc
E G Q F L S M L L K L I N A K N T M E I G V Y T G Y S L L A
271    acggccctggctcttccagatgatgggaagattttggcattggacatcaacagagaaaactatgaaattggattaccaattattgaaaaa
T A L A L P D D G K I L A L D I N R E N Y E I G L P I I E K
361    gctggagttgggtcacaaaattgacttcagagagggccctgctttgcctgttcttgcacatgcttgaagatgggaagtttcatgggaca
A G V G H K I D F R E G P A L P V L D H M L E D G K F H G T
451    ttggattttgtattcgttgatgctgacaaagataactatatcaactaccacaagagattaattgatttagtgaatacggaggacttatc
L D F V F V D A D K D N Y I N Y H K R L I D L V K I G G L I
541    ggctacgacaacacccctttggaatggttctgtggcacagccagctgatgctcccatgaggaagtatgtaaggtaactacagagactttgtg
G Y D N T L W N G S V A Q P A D A P M R K Y V R Y Y R D F V
631    atcgagcttaacaaagccctggctgctgatccaggattgagatctgcatgcttcctgttgggtgatggagttaccctgtgccgtcgatc
I E L N K A L A A D P R I E I C M L P V G D G V T L C R R I
721    agctga
S *

```

# SUPPLEMENTARY FIGURE S10

## Nucleotide sequences and deduced amino acid sequences of *C3'H* from celery

```

1      atggctctccttctgctggctgcatcatctctctcattctcatcattctctacaacttctatcaacggctgagatttaatctccctccc
M A L L L L A A S S L L I L I I L Y N F Y Q R L R F N L P P
91     ggctcctcgacccttacctattgtaggaatctctacgacatcaagccactcaagttccgttgcctttgctgatcttgcacaaactgtacggc
G P R P L P I V G N L Y D I K P L K F R C F A D L A K L Y G
181    cctatcttttgtctacgtctagactccaggcttaatgttgggttacaacagctgagttggctaaagaagtgtgaaggaaaatgatcag
P I F C L R L D S R L N V V V T T A E L A K E V L K E N D Q
271    cagttggctgacaggcacaggaacaaagctactgatatatttagtagaggtgggagtgatttgatatgggctgattatgggcctcattat
Q L A D R H R N K A T D I F S R G G S D L I W A D Y G P H Y
361    gtttaaggctcaggaaagtttgtaatgttgagctttttactcccaagagacttgaagctttgaggccattagagaagatgaagttactgct
V K V R K V C N V E L F T P K R L E A L R P I R E D E V T A
451    atggttgagaccctttatatatgtgcagataagcagggaaaagatttggcttaaggccttacttaggatcagtagcatttaacaacatt
M V E T L Y I C A D K Q G K S L L L R P Y L G S V A F N N I
541    acaagactgtcatttggaaaaagatttgcacacagaaggtggaattgatgagcaaggacaagagttcaagggaattgtttctaattggt
T R L S F G K R F V N S E G G I D E Q G Q E F K G I V S N G
631    atcaagatcggtgccaaagtgttcattgggagagtatgtgccatggccttgcctggatgtttgctggagaaaacgatgtactcaaccagcac
I K I G A K V F M G E Y V P W L R W M F A G E N D V L N Q H
721    gaagctcgtcgggcacgcctgaccaaacagatcatggcagaacatactcttcacgcaacaaaaccgggggtgccaaagatcattttgtt
E A R R A R L T K Q I M A E H T L A R N K T G G A K D H F V
811    gatgcattgctcactcttcagaacagtatgatttaagtacgacactgttatcactctcctatgggacatgatcactgcaggaatggac
D A L L T L Q K Q Y D L S D D T V I T L L W D M I T A G M D
901    acaacttcaatctcagtggaaatgggctatggctgagctagtcagaacccaaggttacagaagaaggcccaagaggagctagaccgggta
T T S I S V E W A M A E L V K N P R V Q K K A Q E E L D R V
991    gttgggtcggaaccgaatcatgacagaagctgacttctccaagctcccttacctgcaatgtgtagccaaggaagcactaagattgcaccct
V G S D R I M T E A D F S K L P Y L Q C V A K E A L R L H P
1081   cctaccctatgatgtccctcacaagccagtgccaataccaaacttggaggtacgacgtcccaaggaatccattgtgcatgttaat
P T P M M L P H K A S A N T K L G G Y D V P K G S I V H V N
1171   gtatgggccattgccctgacctgcattgtggaagacctctggagttttggcccgaaagattcttgaacaagatgttgacatgaaa
V W A I A R D P A L W K D P L E F W P E R F L E Q D V D M K
1261   ggccacgactatcggtccttccattcggtgctggaaggcgaatttgccttggcgctcagcttgctataaacttgggtgacatctatgttg
G H D Y R L L P F G A G R R I C P G A Q L A I N L V T S M L
1351   ggacatcttttgcacattttacttggactccaacagcaggtgtcaggccagaggaagttgacatgagtgaaccaggaatgggtgact
G H L L H H F T W T P T A G V R P E E V D M S E N P G M V T
1441   tacatgaaaacaccagtgaagctattgtactccagattagcagcagagttgtacaacgcgtgccattggacatatag
Y M K T P V Q A I A T P R L A A E L Y K R V P L D I *

```

# SUPPLEMENTARY FIGURE S11

## Nucleotide sequences and deduced amino acid sequences of *COMT* from celery

```

1      atgactacaacgactgagctaattcccaccaacaatccaagtcgatgatgaagaagaagaagcatgcatgtttgccatgcaattagcaagt
M T T T T E L I P P T I Q V D D E E E E A C M F A M Q L A S
91      gcatctgtttctacccatgattctcaaatcagccattgagcttgaccttcttgagtcctatagctaaagctgggtccaggagcttatgtttcg
A S V L P M I L K S A I E L D L L E S I A K A G P G A Y V S
181     ccttctgagcttgcgtctcagcttccatccagtcacactcccgatgcttgaccgcaccccttaggctcttggccagctactct
P S E L A S Q L P S S Q P D T P V M L D R I L R L L A S Y S
271     gtgctcaaatgtaaacttcaagacctgcctcaggggtgggtggagaggctctatgccttggcgcctgtttgcaagttcttgaccaagaac
V L K C K L Q D L P Q G G V E R L Y A L A P V C K F L T K N
361     tctgatgtgtgtctatggcacctcttttgcctcatgaaccaagataagattcttatggaaagctgggtaccacttgaagatgcagtactt
S D G V S M A P L L L M N Q D K I L M E S W Y H L K D A V L
451     gacgggtggaataccttttaacaagcatatggaatgacagcatttgagtaccatggcaaagaccctagattcaaaaagtcttcaatcta
D G G I P F N K A Y G M T A F E Y H G K D P R F N K V F N L
541     ggaatgtctaattcattccactattactatgaagaaaatccttgaaacttacaatggttttgccgtctcaaaactgtgtggatgttggt
G M S N H S T I T M K K I L E T Y N G F A G L K T V V D V G
631     ggaggcaccggagcaacccttaatatgattatctctaataatcctaataatcaaagggttaactttgatctaccccatgttgttgaagat
G G T G A T L N M I I S K Y P N I K G I N F D L P H V V E D
721     gctccatcttatcctgtgtgtagacagcttggaggtgacatgtttgtcagcgtacccgagggggatgctatttttatgaagtggatgtt
A P S Y P G V E H V G G D M F V S V P E G D A I F M K W I C
811     cagatttgagcgtatcacattgtctgtcattcttgaagaattgctataaagcccttcacagaatgggaaggtgatactcgcagaatgc
H D W S D A H C L S F L K N C Y K A L P Q N G K V I L A E C
901     attcttccggaggcaccagactccaagcttacaaccaagaatgtcgttcatatagacgttatcatgtttggcacataatcccgaggagaaaa
I L P E A P D S K L T T K N V V H I D V I M L A H N P G G K
991     gaaagaaccgagaaagaattcgaggcactgggttaaaggccgggttcaaaagctttaacaaggcctgttgtgtcttataatacttgggtt
E R T E K E F E A L G K E A G F K S F N K A C C A Y N T W V
1081    attgaattccttaaatag
I E F L K *

```

# SUPPLEMENTARY FIGURE S12

## Nucleotide sequences and deduced amino acid sequences of *LAC* from celery

```

1      atgaaaaacgacattgcagcagtgacttctgcagcatgtctgtttccgggtcttagttgaatgcagagttcgacattacaagttcaatgtg
M K N D I A A V T S A A C L F P V L V E C R V R H Y K F N V
91     gtgatggcaaatcaagcagactgtgctcgacaaagccaatagtgcaggtgaatggacaattccaggtcctactttaactgctagggaa
V M A N S S R L C S T K P I V T V N G Q F P G P T L T A R E
181    ggtgacacagtgctagtgaagttgtcaaccatgtcaagtacaatgtttcagtcactggcatggcattcgacagctcagaacaggggtgg
G D T V L V K V V N H V K Y N V S V H W H G I R Q L R T G W
271    gcggatgggccagcgtacatcacacaatgccctatccagccggggcaaaactatgtatacaacttcacaatcaccgagcaaaaggggtacc
A D G P A Y I T Q C P I Q P G Q N Y V Y N F T I T E Q R G T
361    ctctggtggcatgcacatatcttatggctacgtgcaacagtagatggcgcgattgtaatccttcttaagagaggtatcccatatccattt
L W W H A H I L W L R A T V H G A I V I L P K R G I P Y P F
451    cccaaacccgacaaggaagttgtgtcgattagctgaatactggaaagcagatacagaactgtgatcaaccaagcacagaatcagga
P K P D K E V V V V L A E Y W K A D T E L V I N Q A Q K S G
541    ttggcgccaaacgtatcagatgcacatacaatcaatgggagaccaggaccagtttcttaactgttcggcacaagatgcattcaaatgagt
L A P N V S D A H T I N G R P G P V S N C S A Q D A F K L S
631    gttgaagcaggaaaaaacgtacatgctacgtatcatcaacgctgcactcaacgaagaacttttctttaaaattgctggacacaagctaact
V E A G K T Y M L R I I N A A L N E E L F F K I A G H K L T
721    gtggttgaagttgatgccacctatgtaaagcctttcaaaactgatacaatcgtagtagcaccgggccaaccaccaacgttttagtgaca
V V E V D A T Y V K P F K T D T I V I A P G Q T T N V L V T
811    gcagacaaatcttcttgcaagtagctttaggtgcctcaccatttatggattctccgattgcagtagacaacgtgactgcaacagcaaca
A D K S S G K Y L M A A S P F M D S P I A V D N V T A T A T
901    ttgcattattcttggaacactttcaagttctccaacctctcgcgaccccaacacctcaaaatgccaccccaattgcagacaatttcaca
L H Y S G T L S S S P T I L A T P T P Q N A T P I A D N F T
991    aactctttacgaagtttgaattcaagaagtaccctgccaaaggttccattaaaggttgatcactctcttatgatcacagtcggactagga
N S L R S L N S K K Y P A K V P L K V D H S L M I T V G L G
1081   attaatccgtgtccaagctgtaagctggtaacggaagccgcgtagtagcatccatgaacaatatcaccttcatatgccaaccacagct
I N P C P S C K A G N G S R V V A S M N N I T F I M P T T A
1171   ctccctcaagcacattacttcaaaatcaaaggtgtttttacaacagattttccaagcaatcctccatttgccttttaattacacaggaaca
L L Q A H Y F K I K G V F T T D F P S N P P F A F N Y T G T
1261   acaccaccgcaaaacttagggaccacaactggaacaaaactatacaggttgcccttacaattccacagttcaactagttctccaagacaca
T P P A N L G T T T G T K L Y R L P Y N S T V Q L V L Q D T
1351   aatataatagccccagaaaacatccaattcatttgcattgattcaacttctttcggttggcagaggacttggaaactttaatccaag
N I I A P E N H P I H L H G F N F F A V G R G L G N F N P K
1441   aaagatccgaaaaactttaatcttgttgaccctgttgagaggaacacaattggtgtaccatccgggggatggacagctattagatttcgt
K D P K N F N L V D P V E R N T I G V P S G G W T A I R F R
1531   gcagataaccaggtgttttggttcattgcattgccacttggaagtacacacaacatggggactaaagatggccttccctggtggacaacgga
A D N P G V W F M H C H L E V H T T W G L K M A F L V D N G
1621   aagggccgaatgagacaatcttgccacctccaagagatctcccaaatgttag
K G P N E T I L P P P R D L P K C *

```

# SUPPLEMENTARY FIGURE S13

## Nucleotide sequences and deduced amino acid sequences of *CSLD3* from celery

```

1      atgacgtcaaaaacaaagtggcaagtcggttatctatgacatcggatgctgatggctctgattcacaccacaagccaccaatgcctcca
M T S K T K V A S R L S M T S D A D G P D S H H K P P M P P
91     actgtcacatttgggaggagaacctcatctggctgatatactagttattcagagatgatcttgatagtgaaacttgaagcagtgatttt
T V T F G R R T S S G R Y I S Y S R D D L D S E L G S S D F
181    atgaactacacagtacacatgccaccaactccagacaatcaaccaatggattccatttcccagaagggtgaagagcagtatgtatcaagt
M N Y T V H M P P T P D N Q P M D S I S Q K V E E Q Y V S S
271    tcactttttacaggtggattcaacagcggttacacgagctcatcttatggacaagggtgactgaatcagaagtcaacctccccagatggct
S L F T G G F N S V T R A H L M D K V T E S E V N H P Q M A
361    ggttcaaaaggatcttcatgtgccattcctggatgtgatggaaggatgatgagtgatgaacgtgggggtggatattccttcttggatgt
G S K G S S C A I P G C D G K V M S D E R G V D I L P C E C
451    gatttcaagatatgcagggttgctatatggatgcggttaagactcggagatggaatttggcctggttgcaaggaacagtataaaggctcct
D F K I C R D C Y M D A V K T G D G I C P G C K E Q Y K V P
541    gatattggatgaagcagaaccgaatggaagacacttcaactcccactccatctgggatttcaaaaatggaaggaggttgctctctcatg
D M D E A E P N G R T L Q L P P P S G I S K M E R R L S L M
631    aaatcaacaaagtcacaaactgatgaggagccatactggggatttggatcacaaatcgatggctctttgaaacgagtgccacctatggctac
K S T K S Q L M R S H T G D F D H N R W L F E T S G T Y G Y
721    ggaatgcttatatggccaaaggagggaggtttgttaacgcgaagggtgaaaagacagctgacctatgattgaggttaacca
G N A I W P K E G G G F V N A K G E K T A D P S D L M G K P
811    tggagaccactcactcgcaagttaaaaataccagctgctattctcagcccatacaggcttctgatcgtgattcgggttggttcttctgca
W R P L T R K L K I P A A I L S P Y R L L I V I R L V L A
901    tttttctggaatggaggatcaccaccccaataatgatgcaatttggctctgggggatgctattgttggtagttatggtttgccttc
F F L E W R I T H P N N D A I W L W G M S I V C E L W F A F
991    tcgtgggttcttgatcaacttccaaaactctgtcctatttaaccgttcacagacctcaatgtcttaaaagagaatttgaatgcctagt
S W V L D Q L P K L C P I N R S T D L N V L K E K F E M P S
1081   ccaataatcccacgggaaaactctgatctccctggaatagatatcttgtgtctactcgagatcctgagaaagaaacctccacttgcact
P N N P T G K S D L P G I D I F V S T A D P E K E P L V T
1171   gcaaacacaattttgtctatcttagccactgattatccagttgaaaagcttgcattgctctctgatgcaggaggtgctcttttgaca
A N T I L S I L A T D Y P V E K L A C Y V S D D G G A L L T
1261   tttagggccatggcagaagccgagcctttgctaacatgtgggttccattttgccgaaaacataattattggccctagaacctgactct
F E A M A E A A S F A N M W V P F C R K H N I E P R N P E S
1351   tatttcagtttgaaggaggtcctacaagaacaggtacggagacagctttgtcaaggaccgttagacgaataaaacgtgagtagacgaa
Y F S L K R D P Y K N K V R T D F V K D R R R I K I V I G
1441   tttaaagtcgcatcaatgggtgccagactctatccgtctgtagatctgacgcctatcatgctcgggaggaaattaaagctatgaaacaa
F K V R I N G L P D S I R R S D A Y H A R E E I K A M K Q
1531   cagagacagaagagatgatgatcccgagagagtattaaagctcgaaagctacatggatggcagatggaaaccttggccaggaaact
Q R Q K R D D D P A E S I K I A K A T W M A D G T H W P T
1621   tggttgactcttcagtagacacactagggtgatcctgtgtataatacaggtgatgctgaaacctccaagtdatgagccactacat
W L T P S V E H T R G D H A G I I Q V M L K P P S D E P L H
1711   ggtacaatcgacgagatgggacattggactccactgatattgatatccgtctcccatgcttgtttatgtatctcgtgagaagcgcct
G T I D E I G T L D S T D I D I R L P M L V Y V S R E K R P
1801   ggctcagatcacaataagaagcaggagccatgaatgctcttgttcgagcttctgcaatcatgtctaattggcccttcttcaatctt
G Y D H N K K A G A M N A L V R A S A I M S N G P F I L N L
1891   gactctgaccactacatctacaactctcaggtctatgaagaaggtatgttttcatgatggataggggtggatcggttcttctgtc
D C T V A E I Y N S Q A M K E G M C F M M D R G D G D C Y V
1981   cagtttcccagagatttggggtattgatccttctgaccggtatcgcaatcacaacactgttttctttgatggaataatcgcgccactt
G F P Q K R F E G I D P S D R Y A N H N T V F F D G N M R A L
2071   gatggcctcagggtcctgtctacgttggacaggatgcctcttgcgaagaattgcactctatggatttgatcgcctcagcgaagaa
D G L Q G P V Y V G T G C L F R R I A L Y G F D P P R A K E
2161   caccacctgtgtcgtcagctgctgttggctcgaaaaagcgtgcctgggtgtcacacacccagaagaacccgcgcgttagaagt
H H P G C C S C C F G R K R I A S V S H T P E E N R A L M
2251   ggtgattctgatgacgaagacatgaatctatctctcgtccaaagaagtttggaaactcaactttccttattgattcgataccagttgca
G D S D D E D M N L S L A P K K F G N S T F L I D S I P V A
2341   gagttccaaggcgcgtcccttgcagatcctcgtgtttaaagtgacagacctcctgggctcttaccattccagagagcttcttgat
E F Q G R P L A D H P A V K N G R P P G A L T I P R E L L D
2431   gcatccactgttgcgaggcaatcagcgtcatctcatgctggatgaggataaaactgagtgggcgatcgtgttgggtggatttacggg
A S T V A E A I S V I S C W Y E D K T E W G D R V G W I Y G
2521   tctgttacagaagatgttgtcacgggtatagaatgcacaataggggatggaaatcagtttattgtgtgactaaacgggatgctttccga
S V T E D V V T G Y R M H N R G W K S V Y C V T K R D A F R
2611   ggaactgctccaacttaacagataggcttcaccaggttctccgttgggctactggttcgggtcagatattcttctctgtaacaat
G T A P I N L T D R L H Q V L R W A T G S V E I F F S R N N
2701   gctctgttagccacatcgaaaatgaagtctctgcaagaattgcttacctcaatgtagaatataccatttaccctatttctctgatt
A L L A T S K M K F L Q R I A Y L N V G I Y P F T S I F L I
2791   gtgtactgttttcttccagcgtctctccttttttctgtgctcattgtccaaagcttgcagttactttcttggcataacctcttgacc
V Y C F L P A L S L F S G Q F I V Q S L D V T F L A Y L L T
2881   attaccatcacactttgttctgtgtgtgaggtgaagtggtcggcattgaattagaggagtggtggagaacagcagcaggttttgg
I T I T L C L L A V L E V K W S G I E L E E W W R N E Q F W
2971   ttgatcgaggaccagtgctcattggctgtgtgtctcaagggtgctgaaagtgtgtgtggatagagatatcttcttactttgaca
L I G G T S A H L A A V L Q G L K L K V V A G I E I S F T L I
3061   tcaaaatcaggagctgaggatgagaacgatgaatttgcgtgagctctatgtagtgaatggacatctctcatgatccctctatcacaatt
S K S G A E D E N D E F A E L Y V V K W T S L M I P P I T I
3151   atgatgactaatctgatttgcctagcagttggatttagccgcacaatatagtcacaataaccacaatggagctcggttactaggggagtt
M M T N L I A I A V G F S R T I Y S Q I P Q W S R L L G G V
3241   ttctttagtttctgggtgctagccatctatcttcttcccaagggttgatgggaagaagaggaagaacaccttaccattgttttcgtg
F F S F V L A H L Y P F A K G L M G R R G R T P I V F V
3331   tggtcagggttatcgccatcaccatatcccttcttgggtgcaattaatccaccacaaggtgctactgaaatcggaggtccttccag
W S G L I A I T I S L L W V S I N P P Q G A T E I G G S F Q
3421   tttccttga
F P *

```

# SUPPLEMENTARY FIGURE S14

## Nucleotide sequences and deduced amino acid sequences of *CESA6* from celery

1 atggatactaagggaagacttattgctggttctcataacagaaatgagtttgttttaataatcaatgctgatgaagttggaaggggtgacttct  
M D T K G R L I A G S H N R N E F V L I N A D E V G R V T S  
91 gtcaaaagagtttaagtgccatttttgccagatttggtagatgagattgaagtaactgttgatggggagccatttttgccctgcaatgaa  
V K E L S G H F C Q I C G D E I E V T V D G E P F V A C N E  
181 tgtgccttccctgttttcagaaactgctatgaatatgagagaagagagggaactcagtcacgcctcaatgtagaaccagatatacaagcgc  
C A F P V C R N C Y E Y E R R E G T Q S C P Q C R T R Y K R  
271 gttaaaggatgtccaagagtggaatggagatgaagaagaagatgaatttgatgatttagataatgagtttgattatgagaacaatgatcaa  
V K G C P R V D G D E E E D E F D D L D N E F D Y E N N D Q  
361 agataccatcatcacggagcgatggaatgctacatctggtgcgccataatattggcgtgttccatctaatgcttcagggatcactaca  
R Y H H H G G D G N A T S G R H N I G R V P S N A S G I T T  
451 cccttagacatggattccttactcttaactcctgaattcctccttacctatggtcaaggagatgatgcaatttcaggcagacaacat  
P L D M D S S T L N P E I P L L T Y G Q E D D A I S A D K H  
541 gctcttattgtccctccatttagggcgctgcaaaagcagtttccctatgcatatactgattcctcagtttctttccaccctccca  
A L I V P P P R G R A K R V H P M P Y T D S S F P R P  
631 atggatccgaaaaaggatttggcagtatatgggtatggttctgtagcatggaaggaaagaatggaggattggaggaaaaagacaaaatgat  
M D P K K D L A V Y G Y G S V A W K E R M E D W R K R Q N D  
721 aagcttcaagtggttgaagcagaggaatgaagatggcaggaatggagatgatttggatgccgatttggccaagatggatgaa  
K L Q V V K H Q G G N E D G R N G D D L D D P D L P K M D E  
811 ggccgacacacctttatcaaggaagctaccgattccttcgagcaagattaatccatacaggatgatcattcctaaccgaatggccattctt  
G R Q P L S R K L P I P S S K I N P Y R M I I L I R M A I L  
901 ggactcttttttactataggtcctcgcatccagtgcagtgatgcttctgcatgttggtgtgtatcagttatttgcgaaatttggtttgc  
G L F F H Y R L R H P V H D A F A L W L V S V I C E I W F A  
991 gtgtcatgatattggaatcatttccgaagtgggtcccttctgagcagagaacacacccggacagactccttaaggatgagaaagaa  
V S W I L D Q F P K W S P I E R E T Y L D R L S L R Y E K E  
1081 gggaaaccttctgagtttagctcctattgacgtctttagtaagtacagtggtaccactaaagaacctccactcattactcacaacacgctc  
G K P S L S R K L P I D V F V S T V D P L K E P P L I T A N T V  
1171 ttatccatcctcgtctgtagattatcctgtggacaaggttgcctgttatgtctctgatgatgtgtgtctgtatgctcacttttgaagctctc  
L S I L A V D Y P V D K V A C Y V S D D G A A M L T F E A L  
1261 tccgaaccttgatttgaaggaagtggttcccttctgcaaggaagtttaatatagaacctcgtgccccaggttggatttttgcgaa  
S E T S E F A R K K W V P F C K K F N I E P R A P E W Y F A E  
1351 aaggttgactatctcaagacaaagtacatccacatttggtaggaacgcctgcaatgaagagagattgaagagtttaagtaaga  
K V D Y L K D K V H P T F V R E R R A M K R D Y E R R  
1441 ataaatgggttagttgccatggcacagaaggttccctgaagaggggtggacaatgaagatgttactccatggccttggttaacaacgttaga  
I N G L V A M A Q K V P E E G W T M Q D G T P W P G N N V R  
1531 gatcatcttggatgattcaggtgttccataggttaataatggttgccttgacactgatggaatgagttgcctcatctagtttatttctt  
D H P G M I Q V F L G N N G V L D T D G N E L P H L V Y V S  
1621 cgtgagaagaggcctggatttgaacaccacaaaaagccggtgctatgaatttcttattccagagtcacagtcattcctcaaatgctcca  
R L F P G F E H H K K A G A M N S L I R V N S A V I A S T L  
1711 tacctactcaatgtcgattgtgatcactacataaacaacagtaaaagcacttagggagtcctatgtgctttatgatggacctacgtctgga  
Y L L N V D C D H Y I N N S K A L R E S M C F M M D P T S G  
1801 aagaagatatgctatgacaatttcccaagatttgaatgggatttgatcgtcatgatcgatacttaactcgcaacgttcttattcttggat  
K K I C Y V Q F P Q R F D G I D R H D R Y S N R N V V F F D  
1891 attaatatgaaggactagacggtatccaaggaccgatattgttgaacaggttgggtgttgcaggaggcaagcttcttattggatgat  
I N M K G L D G I Q G P I Y V G T G C V F R R Q Q A C T I A S T L  
1981 gcacctgtgaagaagaagctgcaggaacaaacttgaactgtttgccaaaaatgggttttgcctgttttggatctagaagaagacacaaa  
A P V K K K A A G K T C N C L P K W F C C C F G S R K K T K  
2071 aaaagttaagtcacaagagaagaagacaagaagagcagggaggtttcaacacagttacctgcacttgaaaatattgaacaagggtattgaa  
K S K S K E K K D K K S R E V S T Q L P A L E N I E Q G I E  
2161 ggaatagatagtgaaaaagtatcactcattcccaagataaattatgagaaaaagtttggacagtcaccagtggtttagcatcaacactt  
S V Y C I P K R A C F K G S A P I N L S D R L H Q Q S P V F I A S T L  
2251 atagaagaaggttgagtagtgcctggagcaacttcagcttcactcttgaagaagccattcatgttattagttgtgggtacgaagacaaa  
I E E G G V L P G A T S A S L L K E A I H V I S C G Y E D K  
2341 acagattggggaaaagaggttgggtggatctatggctctgttactgaagatatattgaccgggttcaagatgcactgcatgttggcga  
T D W G K E V G W I Y G S V T E D I L T G F K M H C H G W R  
2431 tctgtttactgcattcccaagaggttgcctttaaaggttcagctcccatatatttcttgatgcttccaccaagttctcaggtgggccc  
S V Y C I P K R A C F K G S A P I N L S D R L H Q Q S P V F I A S T L  
2521 cttggatctgttgagattcttctgagcaagcattgccccatttggatggttatggttgcggtttgaagccactggaacggttttcgtat  
L G S V E I L L S K H C P I W Y G Y G C G L K P L E R F S Y  
2611 ataaactctgtctatatacctttaaactcgttcccttgccttactgcacattgcccgtgtctgtctgttactggaagatttatc  
I N S V V Y P L T S V P L L A Y C T L P A V C L L T G K F I  
2701 gtgccagagattagcaattatgcagcttctgttgcattggccatgttttgcattgcccgaactagatcttagaataatgcagtggtt  
V P E K I P S N Y A S L V F M A M A F L S I A V T S I L E M Q W A  
2791 cgtgttggatagatgatttgtggagaatgaacagtttgggtgataggaggtgtctcggcacatcttttgcctcttcttcaaggtctt  
R V G I D D L W R N E Q F W V I G G V S A H L F A L F Q G L  
2881 ctcaaggttttggcaggggtgaacactagtttactgttacttcgaaaggaggagatgatggtgaatttccgactgttaccttttcaag  
L K V L A G V N T S F T V T S K G G D D G E F S E L Y L F K  
2971 tggactactttattgctccctccttcttacttattgtaattgtgaacatagtcggggttctagtggaatatcagatgccataaccaatgg  
W T L L L P P L T L I V N I V G V L V G I S D A I T N G  
3061 tacgagtcattggggccgctcttggcaggtgttcttgcatttgggtcattgtccatctgtacccttctcacaaggaatgatgggg  
Y E S W G P L F G R L F F A I W V I V H L Y P F L K G M M G  
3151 aaacagtcgtgagttccgactattataatcggtgtgctgattcttcttcaactcttttcaactttttagggatcggatcaacccctt  
K Q S G V P T I I I V W S I L L A S I F S L L W V R I N P F  
3241 gtatcaagggtatgcatgtattagaagctgcgggttggattgtgaciga  
V S R D G I V L E V C G L D C D \*
